# Supplementary material
Source: PubMed Central journal article supplement (PMC5820930)
Supplement: IAI.00858-17_zii999092310s1.pdf [file IAI.00858-17_zii999092310s1.pdf]

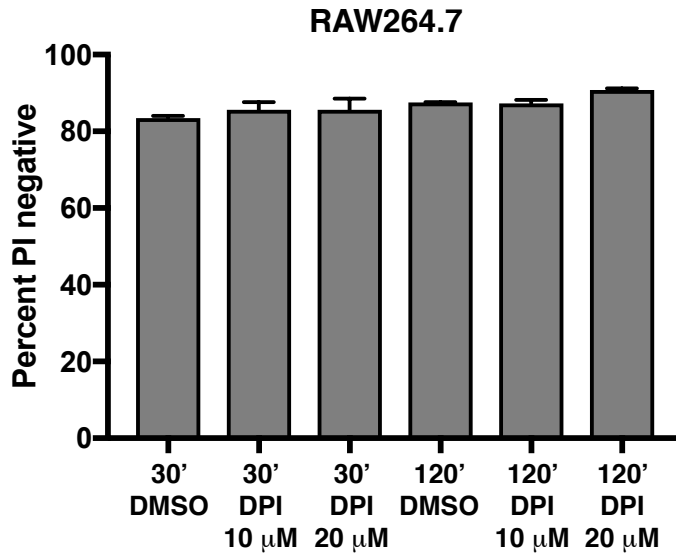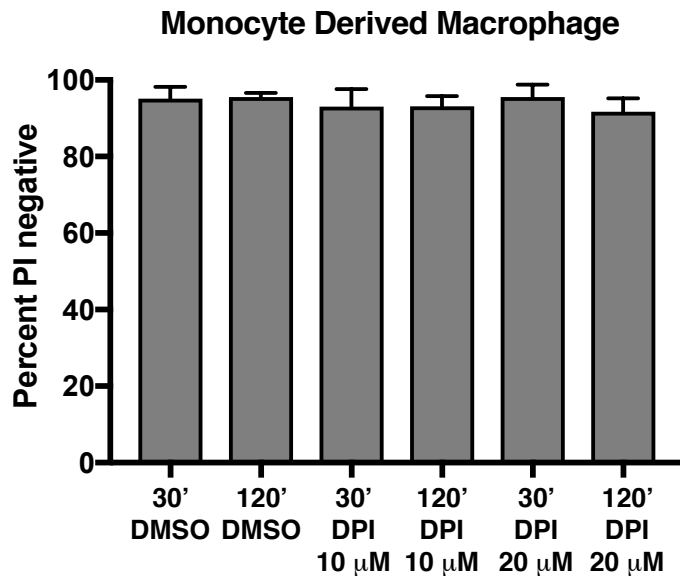

**Figure S1. DPI treated macrophages remain viable.**

Macrophages treated with 10 or 20 μM DPI for 30 or 120 minutes (or DMSO vehicle control) were stained with Propidium Iodide (PI) and analysed by flow cytometry. The percent of viable cells (negative for PI) was not significantly reduced as compared to control cells after DPI treatment. Shown is mean percentage of PI negative cell of 3 independent experiments, with 50,000 cells quantified per condition per experiment.
