# Supplementary material
Source: PubMed Central journal article supplement (PMC5820930)
Supplement: IAI.00858-17_zii999092310s2.pdf [file IAI.00858-17_zii999092310s2.pdf]

**A**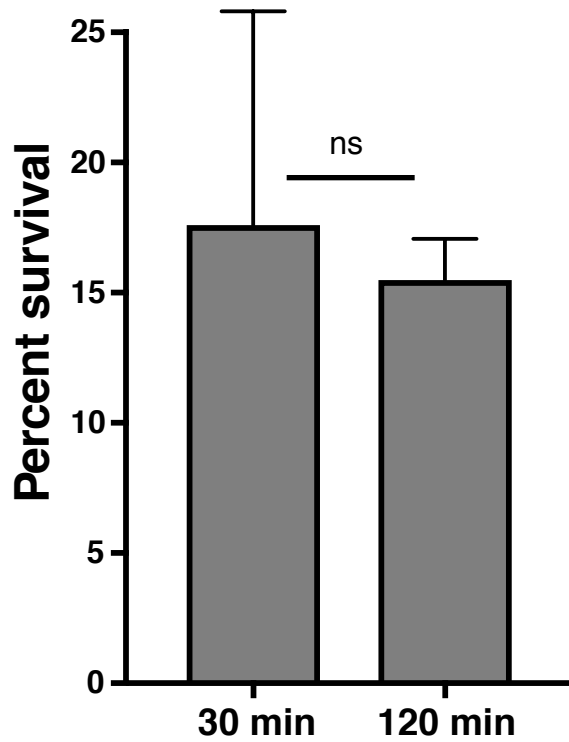**B**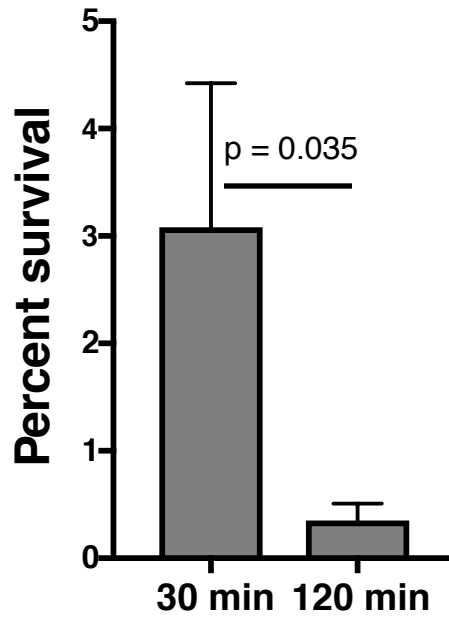

**Figure S2. Long periods of incubation with gentamicin post-phagocytosis can affect *S. gordonii* survival.**

(A) Human monocyte derived macrophages or (B) RAW264.7 mouse macrophages were incubated with gentamicin to prevent growth of non-phagocytosed DL1 *S. gordonii* for 30 minutes of the two hour post-phagocytosis incubation (30 min) or for the full two hour post-phagocytosis incubation (120 min). Shown is mean +/- standard error of 4-8 independent experiments.
