# Supplementary material
Source: PubMed Central journal article supplement (PMC5820930)
Supplement: IAI.00858-17_zii999092310s3.pdf [file IAI.00858-17_zii999092310s3.pdf]

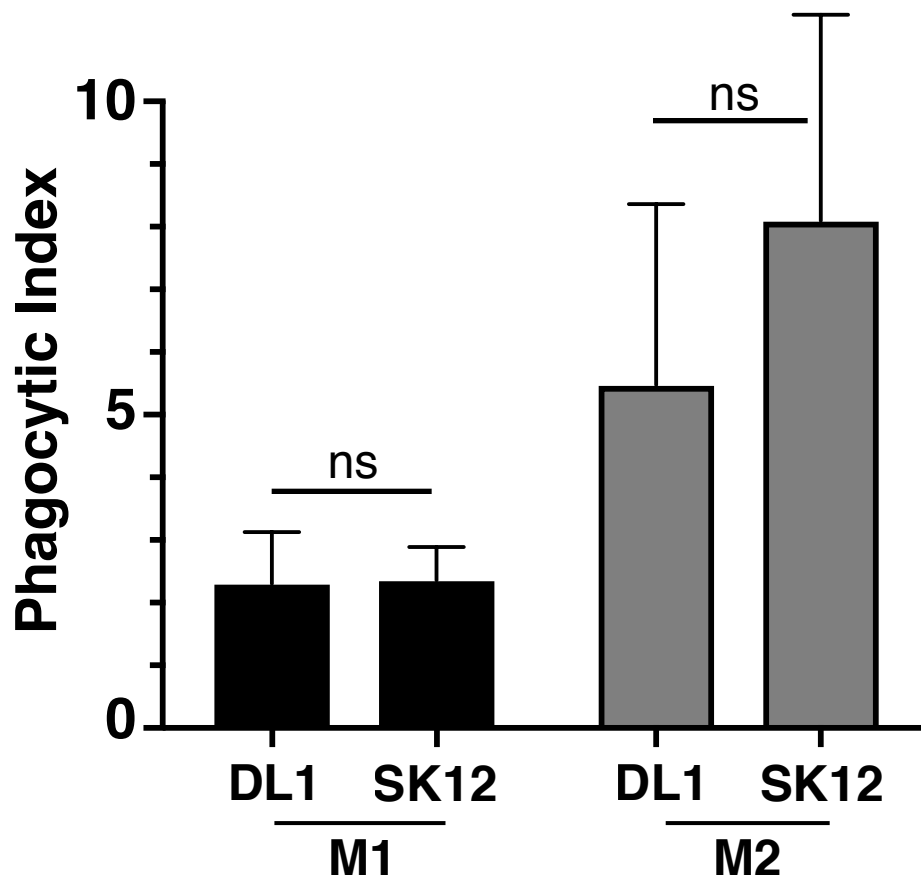

**Figure S3. Rates of *S. gordonii* uptake by macrophages.**

The Phagocytic index (mean number of bacteria taken up per macrophage) does not vary significantly between bacterial strain (DL1 or SK12) or between macrophage activation profile (M1 or M2 activation). Shown is mean  $\pm$  standard error,  $n = 6$ . The number of bacteria internalized by a minimum of 100 macrophages per condition per replicate was quantified.
